# Supplementary material
Source: publisher site journal article supplement (https://www.dovepress.com/article/418741)

**Supplementary Table 1.** Dialysis procedure codes used by Taiwan’s National Health Insurance.

| Procedure | Codes |
| --- | --- |
| Hemodialysis | 58001C, 58019C, 58020C, 58021C, 58022C, 58023C, 58024C, 58025C, 58029C |
| Peritoneal dialysis | 58002C, 58009A, 58009B, 58010A, 58010B, 58011A, 58011AB, 58011B, 58011C, 58012A, 58012B, 58017B, 58017C, 58026C, 58028C |
| Other dialysis | 58018C, 58027C, 58030B |

**Supplementary Table 2.** The ICD-10-CM codes for diseases or conditions addressed in the present study.

| Diseases or conditions | ICD-10-CM codes |
| --- | --- |
| Bone fracture | M4850XA, M4852XA, M4853XA, M4854XA, M4855XA, M4856XA, M4857XA, M80021A, M80022A, M80029A, M80031A, M80032A, M80039A, M80051A, M80052A, M80059A, M8008XA, M84421A, M84422A, M84429A, M84431A, M84432A, M84433A, M84434A, M84439A, M84451A, M84452A, M84453A, M84459A |
| Arterial thrombosis | I74 |
| Cerebral venous sinus thrombosis | O225, O873, I636, I676 |
| Diabetes mellitus | E10, E11 |
| Hypertension | I10 |
| Ischemic stroke or transient ischemic attack | G45, I63, I64 |
| Myocardial infarction | I21, I22, I23, I252 |
| Thrombocytopenia | D693, D694, D695, D696, D7582, D7584 |
| Venous thromboembolism | I26, I81, I82 |
| Coronavirus disease 2019 | U071 |

ICD-10-CM = International Classification of Diseases, 10th version, Clinical Modification.

**Supplementary Figure 1.** Data distribution for the day intervals between vaccination and event occurrence in hemodialysis patients and non-dialysis patients.


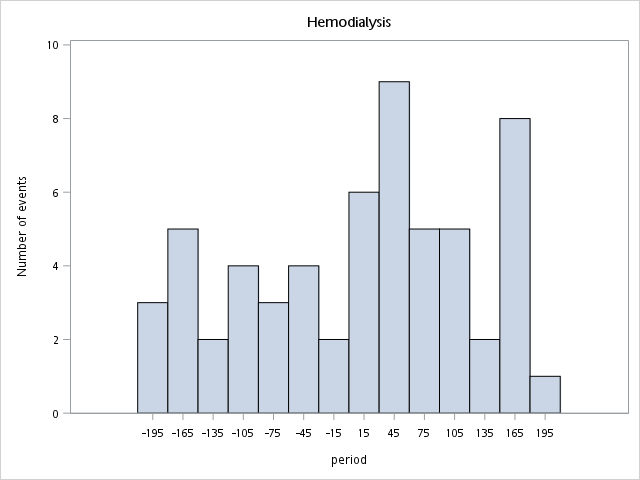


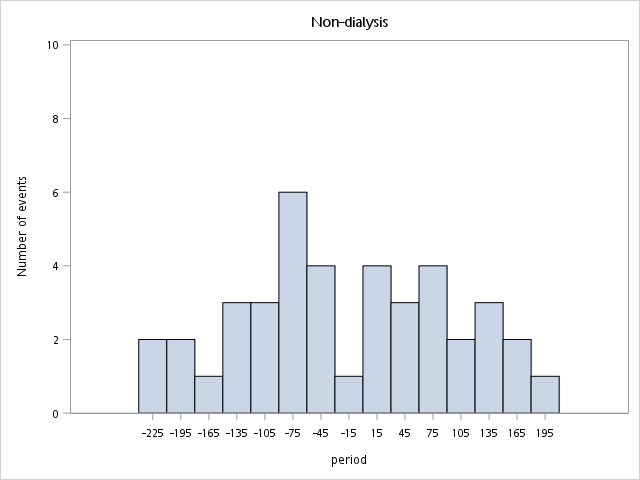

Supplement: Supplementary file 1 [file get_supplementary_file.php]
